# Supplementary material for: Relationship between Oxidative Stress and Physical Activity in Women with Squamous Intraepithelial Lesions in a Cervical Cancer Control Program in the Brazilian Amazon
Source: Hindawi journal article supplement (doi:10.1155/2019/8909852), 2019-10-14
Supplement: f1 [file 8909852.f1.pdf]

| CASE MDA | case MDA ng/ml | CASE IPAQ | CONTROL MDA | control MDA ng/ml | CONTROL IPAQ | CONTROL IPAQ quality | blood sugar case | blood sugar control | total cholesterol case | trigc ase | hdlca se | vldl case | ldl case | TGO case | TGP case | colestc ont | trigc ont | hdlco nt | vldlco nt | ldlco nt | tgoc ont | tgpc o nt |  |
|----------|----------------|-----------|-------------|-------------------|--------------|----------------------|------------------|---------------------|------------------------|-----------|----------|-----------|----------|----------|----------|-------------|-----------|----------|-----------|----------|----------|-----------|--|
| 0.563    | 46.83          | 720       | 0.074       | 5.56              | 198          | 1                    | 85               | 99                  | 186                    | 292       | 54       | 58        | 74       | 32       | 54       | 154         | 42        | 57       | 8         | 89       | 20       | 26        |  |
| 0.822    | 71.43          | 2880      | 0.116       | 6.60              | 7200         | 3                    | 94               | 86                  | 226                    | 153       | 46       | 31        | 149      | 15       | 16       | 208         | 72        | 60       | 14        | 134      | 25       | 25        |  |
| 0.626    | 54.39          | 399       | 0.060       | 6.69              | 2118         | 2                    | 99               | 90                  | 248                    | 260       | 49       | 52        | 147      | 30       | 33       | 309         | 528*      | 108      | -         | -        | 23       | 32        |  |
| 0.536    | 46.57          | 179       | 0.066       | 11.29             | 1440         | 1                    | 77               | 110                 | 247                    | 367       | 76       | 73        | 98       | 19       | 18       | 328         | 309       | 66       | 62        | 200      | 33       | 42        |  |
| 0.673    | 58.48          | 99        | 0.134       | 4.69              | 2628         | 1                    | 93               | 91                  | 206                    | 123       | 51       | 25        | 130      | 23       | 19       | 202         | 92        | 49       | 18        | 135      | 13       | 16        |  |
| 0.552    | 47.96          | 198       | 0.141       | 5.21              | 4320         | 3                    | 97               | 90                  | 207                    | 108       | 66       | 22        | 119      | 21       | 21       | 215         | 68        | 57       | 14        | 144      | 18       | 21        |  |
| 0.534    | 46.40          | 960       | 0.173       | 4.95              | 2373         | 2                    | 110              | 98                  | 207                    | 88        | 68       | 18        | 121      | 26       | 36       | 136         | 149       | 37       | 30        | 69       | 25       | 28        |  |
| 0.451    | 39.19          | 876       | 0.151       | 5.38              | 1038         | 2                    | 98               | 219                 | 195                    | 90        | 76       | 18        | 101      | 20       | 15       | 239         | 320       | 68       | 64        | 107      | 54       | 48        |  |
| 0.520    | 45.18          | 792       | 0.118       | 13.12             | 1995         | 2                    | 89               | 99                  | 225                    | 132       | 48       | 26        | 151      | 27       | 26       | 174         | 83        | 54       | 17        | 103      | 22       | 22        |  |
| 0.635    | 55.18          | 4485      | 0.138       | 11.99             | 792          | 2                    | 90               | 96                  | 199                    | 135       | 78       | 27        | 94       | 22       | 24       | 252         | 380       | 100      | 76        | 76       | 20       | 40        |  |
| 0.531    | 46.14          | 3360      | 0.082       | 10.25             | 0            | 1                    | 103              | 97                  | 193                    | 119       | 50       | 24        | 119      | 23       | 27       | 237         | 284       | 78       | 57        | 102      | 26       | 31        |  |
| 0.543    | 47.18          | 707       | 0.187       | 11.29             | 3012         | 1                    | 97               | 109                 | 154                    | 241       | 40       | 48        | 66       | 23       | 29       | 192         | 70        | 56       | 14        | 122      | 15       | 17        |  |
| 0.514    | 44.66          | 5235      | 0.087       | 12.25             | 1417         | 2                    | 90               | 71                  | 228                    | 173       | 63       | 35        | 130      | 21       | 12       | 143         | 85        | 52       | 17        | 74       | 28       | 24        |  |
| 0.517    | 36.23          | 120       | 0.128       | 5.90              | 4665         | 3                    | 101              | 91                  | 231                    | 192       | 59       | 38        | 134      | 20       | 14       | 183         | 144       | 62       | 29        | 92       | 19       | 18        |  |
| 0.497    | 43.18          | 259       | 0.130       | 8.51              | 579          | 1                    | 91               | 86                  | 158                    | 58        | 40       | 12        | 106      | 30       | 21       | 177         | 211       | 57       | 42        | 78       | 27       | 25        |  |
| 0.634    | 55.09          | 495       | 0.098       | 7.56              | 200          | 1                    | 156              | 73                  | 167                    | 73        | 62       | 15        | 90       | 151      | 215      | 184         | 132       | 65       | 26        | 93       | 25       | 32        |  |
| 0.554    | 48.14          | 198       | 0.076       | 13.20             | 231          | 1                    | 79               | 76                  | 158                    | 88        | 49       | 18        | 91       | 21       | 17       | 142         | 108       | 44       | 22        | 76       | 35       | 61        |  |
| 0.298    | 25.89          | 952       | 0.152       | 11.55             | 1638         | 1                    | 128              | 89                  | 173                    | 270       | 62       | 54        | 57       | 19       | 11       | 148         | 118       | 50       | 24        | 74       | 24       | 19        |  |
|          | 5.56           | 198       | 0.068       | 7.50              | 1980         | 2                    |                  | 81                  |                        |           |          |           |          |          |          | 215         | 87        | 49       | 17        | 149      | 34       | 58        |  |
|          | 6.60           | 7200      | 0.077       | 9.12              | 2730         | 2                    |                  | 328                 |                        |           |          |           |          |          |          | 189         | 92        | 67       | 18        | 104      | 59       | 70        |  |
|          | 6.69           | 2118      | 0.133       | 5.90              | 1158         | 2                    |                  | 80                  |                        |           |          |           |          |          |          | 127         | 128       | 44       | 26        | 57       | 19       | 25        |  |
|          | 11.29          | 1440      | 0.105       | 15.03             | 4038         | 3                    |                  | 76                  |                        |           |          |           |          |          |          | 190         | 266       | 63       | 53        | 74       | 29       | 29        |  |
|          | 4.69           | 2628      | 0.060       | 28.24             | 2076         | 2                    |                  | 77                  |                        |           |          |           |          |          |          | 176         | 214       | 59       | 43        | 74       | 23       | 23        |  |
|          | 5.21           | 4320      | 0.054       | 11.12             | 3360         | 3                    |                  | 97                  |                        |           |          |           |          |          |          | 189         | 86        | 98       | 17        | 74       | 25       | 17        |  |
|          | 4.95           | 2373      | 0.064       | 10.08             | 968          | 2                    |                  | 103                 |                        |           |          |           |          |          |          | 155         | 88        | 28       | 18        | 109      | 24       | 29        |  |
|          | 5.38           | 1038      | 0.325       | 5.73              | 3650         | 2                    |                  | 89                  |                        |           |          |           |          |          |          | 232         | 139       | 56       | 28        | 148      | 37       | 21        |  |
|          | 13.12          | 1995      | 0.062       | 7.12              | 1695         | 2                    |                  | 136                 |                        |           |          |           |          |          |          |             |           |          |           |          |          |           |  |
|          | 11.99          | 792       | 0.057       | 5.21              | 1770         | 2                    |                  | 84                  |                        |           |          |           |          |          |          |             |           |          |           |          |          |           |  |
|          | 10.25          | 0         |             |                   |              |                      |                  |                     |                        |           |          |           |          |          |          |             |           |          |           |          |          |           |  |
|          | 11.29          | 3012      |             |                   |              |                      |                  |                     |                        |           |          |           |          |          |          |             |           |          |           |          |          |           |  |
|          | 12.25          | 1417      |             |                   |              |                      |                  |                     |                        |           |          |           |          |          |          |             |           |          |           |          |          |           |  |
|          | 5.90           | 4665      |             |                   |              |                      |                  |                     |                        |           |          |           |          |          |          |             |           |          |           |          |          |           |  |
|          | 8.51           | 579       |             |                   |              |                      |                  |                     |                        |           |          |           |          |          |          |             |           |          |           |          |          |           |  |
|          | 7.56           | 200       |             |                   |              |                      |                  |                     |                        |           |          |           |          |          |          |             |           |          |           |          |          |           |  |
|          | 13.20          | 231       |             |                   |              |                      |                  |                     |                        |           |          |           |          |          |          |             |           |          |           |          |          |           |  |
|          | 11.55          | 1638      |             |                   |              |                      |                  |                     |                        |           |          |           |          |          |          |             |           |          |           |          |          |           |  |
|          | 7.50           | 1980      |             |                   |              |                      |                  |                     |                        |           |          |           |          |          |          |             |           |          |           |          |          |           |  |
|          | 9.12           | 2730      |             |                   |              |                      |                  |                     |                        |           |          |           |          |          |          |             |           |          |           |          |          |           |  |
|          | 5.90           | 1158      |             |                   |              |                      |                  |                     |                        |           |          |           |          |          |          |             |           |          |           |          |          |           |  |
|          | 15.03          | 4038      |             |                   |              |                      |                  |                     |                        |           |          |           |          |          |          |             |           |          |           |          |          |           |  |
|          | 28.24          | 2076      |             |                   |              |                      |                  |                     |                        |           |          |           |          |          |          |             |           |          |           |          |          |           |  |
|          | 11.12          | 3360      |             |                   |              |                      |                  |                     |                        |           |          |           |          |          |          |             |           |          |           |          |          |           |  |
|          | 10.08          | 968       |             |                   |              |                      |                  |                     |                        |           |          |           |          |          |          |             |           |          |           |          |          |           |  |
|          | 5.73           | 3650      |             |                   |              |                      |                  |                     |                        |           |          |           |          |          |          |             |           |          |           |          |          |           |  |
|          | 7.12           | 1695      |             |                   |              |                      |                  |                     |                        |           |          |           |          |          |          |             |           |          |           |          |          |           |  |
|          | 5.21           | 1770      |             |                   |              |                      |                  |                     |                        |           |          |           |          |          |          |             |           |          |           |          |          |           |  |
